# Supplementary material for: Automated black-box boundary value detection
Source: PeerJ journal article supplement (doi:10.7717/peerj-cs.1625), 2023-11-07

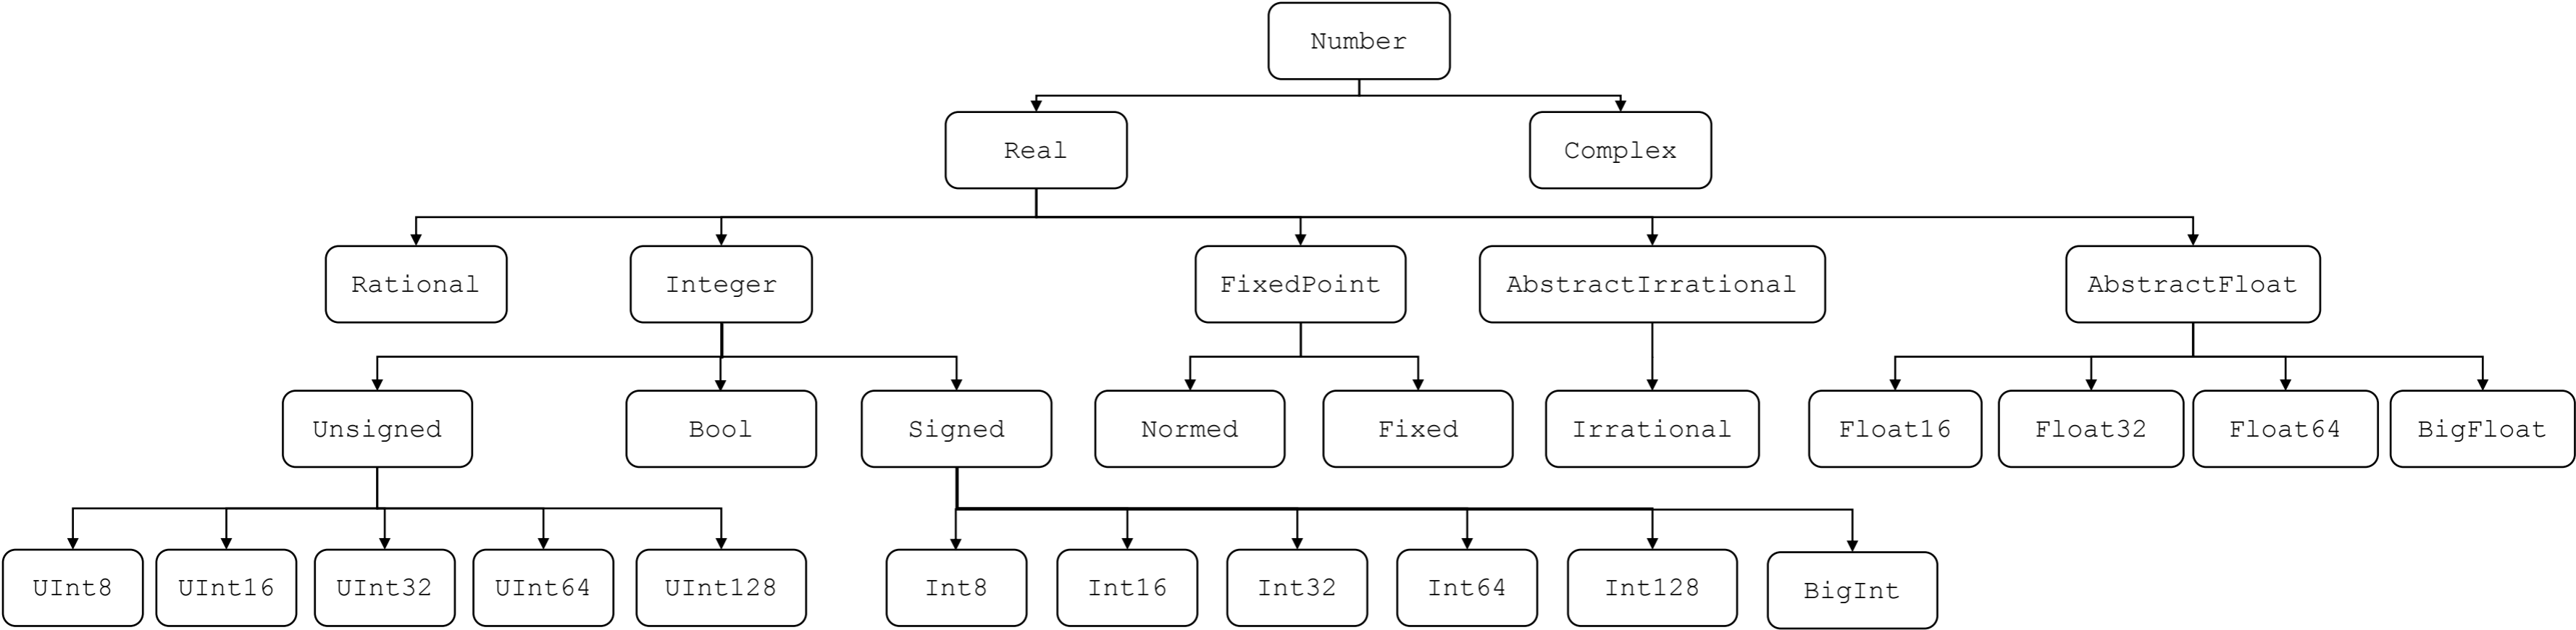

Supplement: Figure_A1JuliaTree.pdf [file Figure_A1JuliaTree.pdf]
